# Supplementary material
Source: publisher figshare collection journal article supplement (https://acs.figshare.com/ndownloader/files/5763774)
Supplement: Supplementary file 1 [file 5763774]

## Figure I of Supporting Information

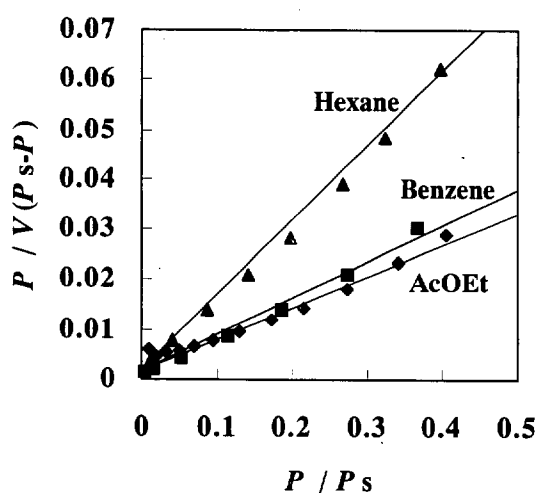

BET plots for the adsorption of hexane, benzene, and ethyl acetate with Zr-host at 298 K .

T. Sawaki and Y. Aoyama

Immobilization of a Soluble Metal Complex in an Organic Network.  
Remarkable Catalytic Performance of a Porous Dialkoxyzirconium  
Polyphenoxide As a Functional Organic Zeolite Analogue
